# Supplementary material for: Public attitudes towards novel reproductive technologies: a citizens’ jury on mitochondrial donation
Source: PubMed Central journal article supplement — Hum Reprod. 2019 Mar 13;34(4):751–7. doi: 10.1093/humrep/dez021 (PMC6443113; doi:10.1093/humrep/dez021), 2019-03-13
Supplement: dez021_supplementary_file_1_juror_attitudes_survey.pdf [file dez021_supplementary_file_1_juror_attitudes_survey.pdf]

**Supplementary File 1:** Juror Attitudes Survey. This survey was provided at three time-points during the citizens' jury.

THE QUESTION FOR THIS JURY:

**This jury is about whether Australia should allow children to be born via mitochondrial donation.**

It is currently illegal to use mitochondrial donation to try to achieve a pregnancy in Australia. Research using some methods of mitochondrial donation might be possible, but would need a licence.

There are at-risk Australian families who, if it were available, would be interested to use mitochondrial donation. Equally, there are those who voice concern about it.

Please complete the following questions:

1. *Knowledge of mitochondrial disease and mitochondrial donation:*

How confident do you feel in your knowledge about mitochondrial disease and mitochondrial donation?

|           |   |   |   |            |   |   |   |   |           |
|-----------|---|---|---|------------|---|---|---|---|-----------|
| 1         | 2 | 3 | 4 | 5          | 6 | 7 | 8 | 9 | 10        |
| Not       |   |   |   | Moderately |   |   |   |   | Very      |
| Confident |   |   |   | Confident  |   |   |   |   | Confident |

2. *Addressing the Jury question:*

The over-arching question for this jury is in a yes/no format. Which of these options do you endorse? (please tick one)

a. Australia SHOULD allow children to be born via mitochondrial donation.

OR

b. Australia should NOT allow children to be born via mitochondrial donation.

Please tell us the key reasons why you feel this way. Are there any 'riders' or conditions that you would put on your response? If so, please tell us about those too.
