# Supplementary material for: Public attitudes towards novel reproductive technologies: a citizens’ jury on mitochondrial donation
Source: PubMed Central journal article supplement — Hum Reprod. 2019 Mar 13;34(4):751–7. doi: 10.1093/humrep/dez021 (PMC6443113; doi:10.1093/humrep/dez021), 2019-03-13
Supplement: dez021_supplementary_file_2_juror_satisfaction_survey.pdf [file dez021_supplementary_file_2_juror_satisfaction_survey.pdf]

**Supplementary File 2:** Juror Satisfaction Survey. This survey was completed by all jurors at the jury’s conclusion.

Acknowledgement: This evaluation Survey was written by Professor Stacy Carter & Dr Chris Degeling, University of Wollongong, Australia. It was adapted for this jury and used with permission

**Citizens’ jury experience: mitochondrial donation in Australia**

The following questions are designed to assess your experience of participating.

For each of these questions, **please rate from 1 (not at all) to 10 (very much).**

|                                                                                                                      | <b>Not at all</b> |          |          |          |          |          |          |          | <b>Very much</b> |           |
|----------------------------------------------------------------------------------------------------------------------|-------------------|----------|----------|----------|----------|----------|----------|----------|------------------|-----------|
|                                                                                                                      | <b>1</b>          | <b>2</b> | <b>3</b> | <b>4</b> | <b>5</b> | <b>6</b> | <b>7</b> | <b>8</b> | <b>9</b>         | <b>10</b> |
| 1. Do you feel that your opinions were respected by the group?                                                       | 1                 | 2        | 3        | 4        | 5        | 6        | 7        | 8        | 9                | 10        |
| 2. Do you feel that you were listened to by the facilitator?                                                         | 1                 | 2        | 3        | 4        | 5        | 6        | 7        | 8        | 9                | 10        |
| 3. Do you feel that the process that led to the group’s responses was fair?                                          | 1                 | 2        | 3        | 4        | 5        | 6        | 7        | 8        | 9                | 10        |
| 4. How willing are you to abide by the group’s final position, even if you personally have a different view?         | 1                 | 2        | 3        | 4        | 5        | 6        | 7        | 8        | 9                | 10        |
| 5. How helpful did you find each of the following:                                                                   |                   |          |          |          |          |          |          |          |                  |           |
| a. The video presentations from the expert witnesses                                                                 | 1                 | 2        | 3        | 4        | 5        | 6        | 7        | 8        | 9                | 10        |
| b. Question and answer interaction with experts                                                                      | 1                 | 2        | 3        | 4        | 5        | 6        | 7        | 8        | 9                | 10        |
| c. The discussion led by the facilitator                                                                             | 1                 | 2        | 3        | 4        | 5        | 6        | 7        | 8        | 9                | 10        |
| d. The discussion with other participants when the researchers left the room                                         | 1                 | 2        | 3        | 4        | 5        | 6        | 7        | 8        | 9                | 10        |
| 6. How much did participating in the jury change your <i>understanding</i> of the process of mitochondrial donation? | 1                 | 2        | 3        | 4        | 5        | 6        | 7        | 8        | 9                | 10        |
| 7. How much did attending the session change your <i>opinion</i>                                                     | 1                 | 2        | 3        | 4        | 5        | 6        | 7        | 8        | 9                | 10        |

about allowing children to be born  
via mitochondrial donation?

Questions adapted from De Vries, R., et al. (2011). A Framework for Assessing the Quality of Democratic Deliberation: Enhancing Deliberation as a Tool for Bioethics." *Journal of Empirical Research on Human Research Ethics* 6(3): 3-17.

For each of these questions, **please circle one**:

8. Throughout the process my awareness of different points of view on allowing children to be born via mitochondrial donation has:

**Increased                      Stayed about the same                      Decreased**

9. Throughout the process my confidence in my ability to present my point of view has:

**Increased                      Stayed about the same                      Decreased**

10. Throughout the process the confidence of most participants in their ability to present their point of view has:

**Increased                      Stayed about the same                      Decreased**

11. My sense of connection to the group has:

**Increased                      Stayed about the same                      Decreased**

For each of these questions, **please rate from 1 (Strongly Disagree) to 5 (Strongly Agree)**.

|                                                                                                                                         | <b>Strongly disagree</b> |          |          |          |          | <b>Strongly agree</b> |  |  |  |  |
|-----------------------------------------------------------------------------------------------------------------------------------------|--------------------------|----------|----------|----------|----------|-----------------------|--|--|--|--|
| 12. I feel a part of the group now                                                                                                      | <b>1</b>                 | <b>2</b> | <b>3</b> | <b>4</b> | <b>5</b> |                       |  |  |  |  |
| 13. The outcome of this event matched my expectations                                                                                   | <b>1</b>                 | <b>2</b> | <b>3</b> | <b>4</b> | <b>5</b> |                       |  |  |  |  |
| 14. I feel that the views I expressed during this jury will influence policy on allowing children to be born via mitochondrial donation | <b>1</b>                 | <b>2</b> | <b>3</b> | <b>4</b> | <b>5</b> |                       |  |  |  |  |
| 15. I feel that the views expressed by this jury will influence policy on allowing children to be born via mitochondrial donation       | <b>1</b>                 | <b>2</b> | <b>3</b> | <b>4</b> | <b>5</b> |                       |  |  |  |  |
| 16. I want to participate in other events like this one in the future                                                                   | <b>1</b>                 | <b>2</b> | <b>3</b> | <b>4</b> | <b>5</b> |                       |  |  |  |  |

- |                                                                                   |   |   |   |   |   |
|-----------------------------------------------------------------------------------|---|---|---|---|---|
| 17. Citizens should be given more opportunity to participate in events like these | 1 | 2 | 3 | 4 | 5 |
| 18. Participating in the jury was a worthwhile experience                         | 1 | 2 | 3 | 4 | 5 |
| 19. Participating in the jury was enjoyable                                       | 1 | 2 | 3 | 4 | 5 |

Questions adapted from Timotijevic, L. and M. M. Raats (2007). Evaluation of two methods of deliberative participation of older people in food-policy development. *Health Policy* **82**(3): 302-319.
